# Supplementary material for: RAFT solution polymerisation of bio-based γ-methyl-α-methylene-γ-butyrolactone monomer in DMSO and Cyrene
Source: Royal Society of Chemistry journal article supplement (doi:10.1039/d4cc04571h), 2024-01-01
Supplement: d4cc04571h1.pdf [file d4cc04571h1.pdf]

## Supporting Information

### **RAFT solution polymerisation of bio-based $\gamma$ -methyl- $\alpha$ -methylene- $\gamma$ -butyrolactone monomer in DMSO and Cyrene**

Ollie Harris,<sup>a</sup> Ryan Larder,<sup>a</sup> Beth Jordan,<sup>a</sup> Imogen Prior,<sup>a</sup> Rita El-Khoury,<sup>a</sup> Khaled O. Sebakhy<sup>b</sup> and Fiona L. Hatton\*<sup>a</sup>

*a. Department of Material, Loughborough University, Loughborough, LE11 3TU, UK.*

*b. Department of Materials, Textiles and Chemical Engineering, Centre for Polymer and Material Technologies (CPMT), Ghent University, Ghent, Belgium.*

Corresponding author email: [f.hatton@lboro.ac.uk](mailto:f.hatton@lboro.ac.uk)

## **Experimental details**

### **Materials**

All reagents were used as received.  $\gamma$ -methyl- $\alpha$ -methylene- $\gamma$ -butyrolactone ( $\gamma$ MeMBL, 97%) was obtained from TCI. 2-Cyano-2-propyl benzodithioate (CPBD, >97%), 4-cyanopentanoic acid dithiobenzoate (CPADB), 2-cyano-2-propyl dodecyl trithiocarbonate (CPDT, 97%), 4,4'-azobis(4-cyanovaleric acid) (ACVA,  $\geq$ 98%), 2,2'-azobis(2-methylpropionitrile) (AIBN, 98%) and Cyrene ( $\geq$  98.5%) were purchased from Merck. DMSO (99+%), t-butanol (99.5%) and chloroform-d ( $\text{CDCl}_3$ , 99.8 atom% D) were purchased from ThermoScientific. THF (99%, stabilised with 250-350 ppm BHT) was obtained from Alfa Aesar and Methanol (99.6%) was purchased from Honeywell.

### **RAFT Solution Polymerisation of $\gamma$ MeMBL**

Details of a typical experiment are given, exemplified here targeting the synthesis of  $\text{P}(\gamma\text{MeMBL})_{100}$  in DMSO at 70 °C, using CPDB and AIBN as the CTA and initiator, respectively.

AIBN (2.9 mg, 0.018 mmol), CPDB (19.7 mg, 0.089 mmol) and  $\gamma$ MeMBL (1.00 g, 8.918 mmol) were weighed into a round bottom flask and DMSO (1.54 g) was added to give a final solids content of 40% w/w. The reaction vessel was sealed and degassed with  $\text{N}_2$  for 20 minutes. Following degassing the reaction vessel was sealed and placed into an oil bath 70 °C. After 24 h the reaction mixture was removed from the oil bath, exposed to the air and allowed to cool to room temperature. A sample was removed for  $^1\text{H}$  NMR spectroscopy to determine conversion and for GPC analysis to determine molecular weight and dispersity. Polymers were purified by first diluting the mixture with THF to approximately 20% w/w solids then precipitating twice into methanol. Pure  $\text{P}(\gamma\text{MeMBL})$  polymers were obtained as fine, pink coloured powders.

For kinetic evaluation, a small sample (<0.1 mL) was extracted from the reaction mixture at specific time intervals using a degassed syringe while under a flow of  $\text{N}_2$ . For all RAFT screening experiments (see Table S1) a solids content of 40% w/w was maintained in all cases.

When targeting different degrees of polymerisation, the amount of CPDB and AIBN were varied, while maintaining a final solids content of 40% w/w.

Polymerisations in Cyrene were conducted under identical reaction conditions, except that Cyrene was used as the solvent instead of DMSO. Generally crude reaction mixtures had high viscosities when high conversions were obtained, more so for Cyrene than DMSO due to the increased viscosity of Cyrene, compared with DMSO. Kinetic evaluation of the polymerisation of  $\gamma$ MeMBL in Cyrene was conducted concurrently in separate vials for each time point due to issues with sampling due to high solution viscosities. Polymerisations were stopped at pre-determined time points by removing from the oil bath and exposing to air and diluting for  $^1\text{H}$  NMR and GPC analyses.

### **Characterisation**

Proton nuclear magnetic resonance ( $^1\text{H}$  NMR) spectra were recorded using a JEOL ECS 400 MHz spectrometer at 21 °C on sample dissolved in  $\text{CDCl}_3$ . Spectra were processed using Delta 5.3.1 software.

Gel permeation chromatography (GPC) analysis was performed using an Agilent 1260 Infinity GPC system, equipped with both refractive index and UV detectors, with chloroform eluent containing 2% v/v triethylamine. Samples were injected at a flow rate of 1.0 mL/min through a guard column, followed by two separation columns (Agilent PL gel 5  $\mu\text{m}$  Mixed-C) at 40 °C. All samples were prepared to an approximate concentration of 5 mg/mL. The system was calibrated using near-monodisperse poly(styrene) standards ( $M_p$  ranging from 162 to 364,000 g mol $^{-1}$ ). Chromatograms were analysed using Agilent GPC/SEC software.

Differential scanning calorimetry (DSC) was performed using TA Instruments Q2000 DSC under an  $\text{N}_2$  atmosphere. A heat-cool-heat program between 0 and 250 °C (10 °C min $^{-1}$  ramp) was performed, with glass transition temperatures ( $T_g$ ) recorded from the second heat cycle. Analysis of results was performed

using TA Instruments Universal Analysis software. Glass transition temperatures ( $T_g$ ) were determined using the half height method.

Thermogravimetric analysis (TGA) was performed on a TA Instruments TGA 550 using platinum crucibles over a temperature range of 30 to 700 °C, at a heating rate of 10 °C min<sup>-1</sup> under an argon atmosphere. Analysis of results was performed using TA Instruments Trios software and the onset of degradation was determined using the software from the inflection point.

## Supplementary figures and tables

**Table S1.** Reaction conditions, conversions and molecular weight data ( $M_n$ ,  $M_w$ ,  $\mathcal{D}$ ) obtained from initial screening of the RAFT solution polymerisation of  $\gamma$ MeMBL, targeting a degree of polymerisation of 100, conducted at 70 °C for 24 h.

| Entry | Solvent           | CTA   | Initiator | CTA/In | Conv <sup>a</sup><br>(%) | $M_{n\ th}^b$<br>(g mol <sup>-1</sup> ) | $M_n^c$<br>(g mol <sup>-1</sup> ) | $M_w^c$<br>(g mol <sup>-1</sup> ) | $\mathcal{D}^c$ |
|-------|-------------------|-------|-----------|--------|--------------------------|-----------------------------------------|-----------------------------------|-----------------------------------|-----------------|
| 1     | MeOH              | CPDB  | AIBN      | 5      | >99                      | 5800                                    | 6000                              | 11300                             | 1.88            |
| 2     | <i>t</i> -butanol | CPDB  | AIBN      | 5      | 98                       | 5700                                    | 3900                              | 20600                             | 5.27            |
| 3     | DMSO              | CPDB  | AIBN      | 5      | 95                       | 5600                                    | 7900                              | 10000                             | 1.26            |
| 4     | Cyrene            | CPDB  | AIBN      | 5      | 78                       | 4600                                    | 7100                              | 9400                              | 1.32            |
| 5     | DMSO              | CPDB  | ACVA      | 5      | 90                       | 5300                                    | 6500                              | 9000                              | 1.37            |
| 6     | DMSO              | CPADB | AIBN      | 5      | 86                       | 5100                                    | 5500                              | 7600                              | 1.32            |
| 7     | DMSO              | CPDT  | AIBN      | 5      | 97                       | 5800                                    | 6100                              | 8600                              | 1.41            |
| 8     | DMSO              | CPDB  | AIBN      | 10     | 89                       | 5200                                    | 7500                              | 9400                              | 1.25            |
| 9     | DMSO              | CPDB  | AIBN      | 2.5    | >99                      | 5800                                    | 8000                              | 10300                             | 1.27            |

<sup>a</sup> Conversion determined by <sup>1</sup>H NMR Spectroscopy. <sup>b</sup> Theoretical  $M_n$  ( $M_{n\ th}$ ) calculated as follows:  $M_{n\ th} = ((M_{w\ mon} \times \text{target DP}) \times (\text{Conv}/100)) + M_{w\ CTA}$ . <sup>c</sup> Determined by CHCl<sub>3</sub> GPC analyses.

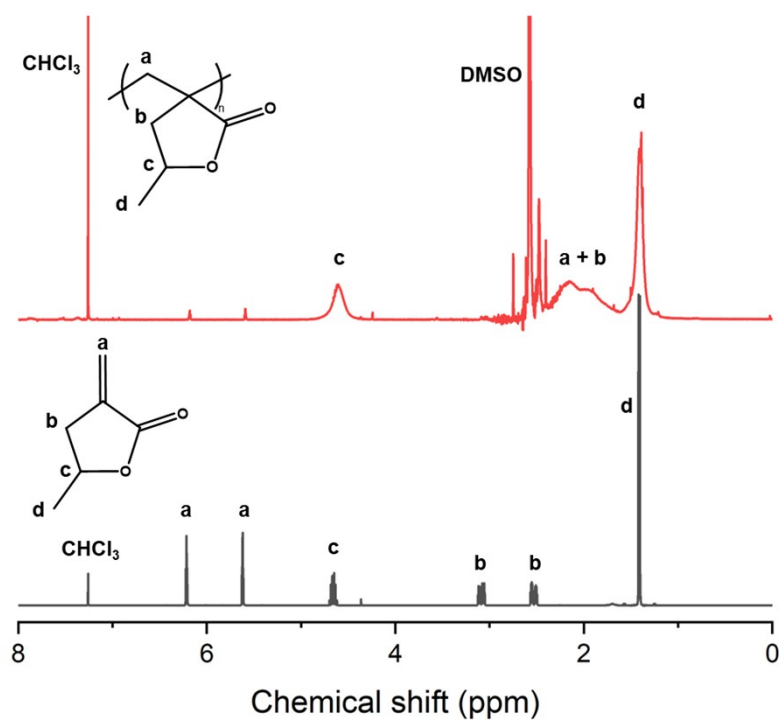

**Figure S1.** Assigned <sup>1</sup>H NMR (400 MHz, *d*<sub>6</sub>-DMSO) spectra for the  $\gamma$ MeMBL monomer (bottom) and the resulting P( $\gamma$ MeMBL) polymer after conducting RAFT solution polymerisation in DMSO for 24 h.

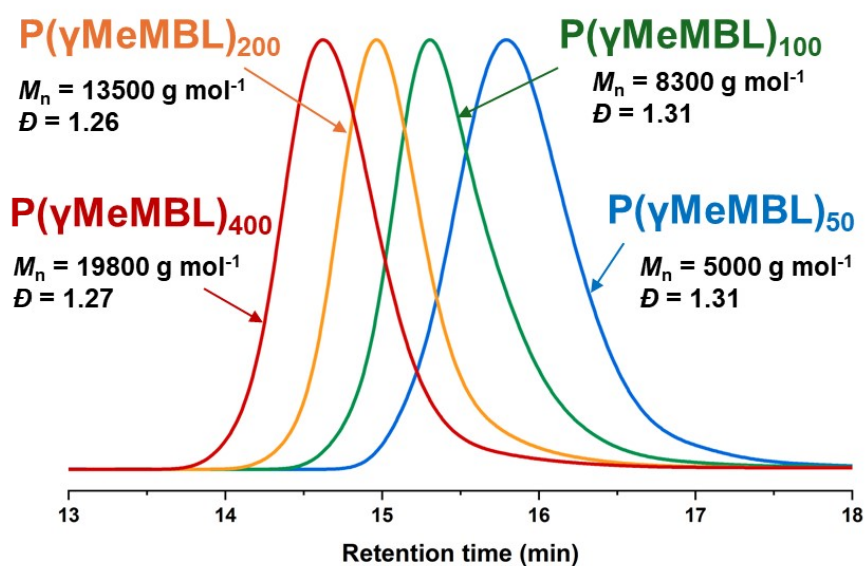

**Figure S2.** Normalised overlaid GPC chromatograms for P(γMeMBL)<sub>x</sub> synthesised by RAFT solution polymerisation of γMeMBL in DMSO at 70 °C for 24 h, using CPDB.

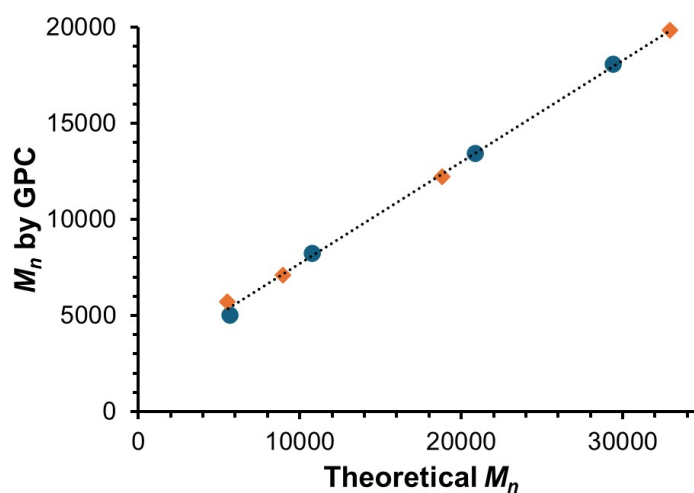

**Figure S3.**  $M_n$  determined by GPC analyses versus theoretical  $M_n$  for P(γMeMBL)<sub>x</sub> synthesised by RAFT solution polymerisation of polymerisation of γMeMBL in DMSO (orange diamonds) and Cyrene (blue circles) at 70 °C for 24 h, using CPDB.

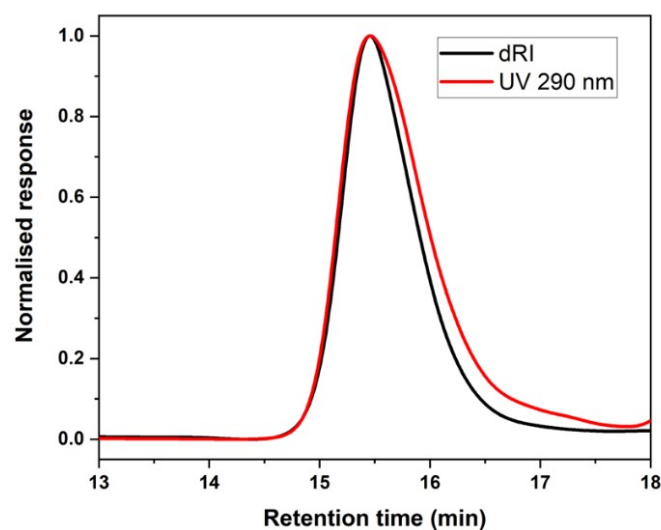

**Figure S4.** GPC data for P( $\gamma$ MeMBL)<sub>100</sub> synthesised in Cyrene, showing both the normalised differential refractive index (dRI) and UV (collected at 290 nm) detector responses. The data is representative of all P( $\gamma$ MeMBL) samples synthesised in this work.

**Table S2.** Conversions and molecular weight data ( $M_n$ ,  $M_w$ ,  $\mathcal{D}$ ) obtained the synthesis of P( $\gamma$ MeMBL)<sub>50</sub> and subsequent chain extension of the macro-RAFT with an additional 50 units of  $\gamma$ MeMBL. Reactions were conducted at 70 °C for 24 h in DMSO using a CTA/initiator ratio of 5.

| Target Composition                | CTA                              | Monomer/CTA | Conv <sup>a</sup> (%) | $M_{n\ th}^b$ (g mol <sup>-1</sup> ) | $M_n^c$ (g mol <sup>-1</sup> ) | $M_w^c$ (g mol <sup>-1</sup> ) | $\mathcal{D}^c$ |
|-----------------------------------|----------------------------------|-------------|-----------------------|--------------------------------------|--------------------------------|--------------------------------|-----------------|
| P( $\gamma$ MeMBL) <sub>50</sub>  | CPDB                             | 50          | >99                   | 5800                                 | 5200                           | 6700                           | 1.29            |
| P( $\gamma$ MeMBL) <sub>100</sub> | P( $\gamma$ MeMBL) <sub>50</sub> | 50          | 96                    | 11200                                | 12200                          | 17700                          | 1.45            |

<sup>a</sup> Conversion determined by <sup>1</sup>H NMR Spectroscopy. <sup>b</sup> Theoretical  $M_n$  ( $M_{n\ th}$ ) calculated as follows:  $M_{n\ th} = ((M_{w\ mon} \times \text{target DP}) \times (\text{Conv}/100)) + M_{w\ CTA}$ . <sup>c</sup> Determined by CHCl<sub>3</sub> GPC analyses.

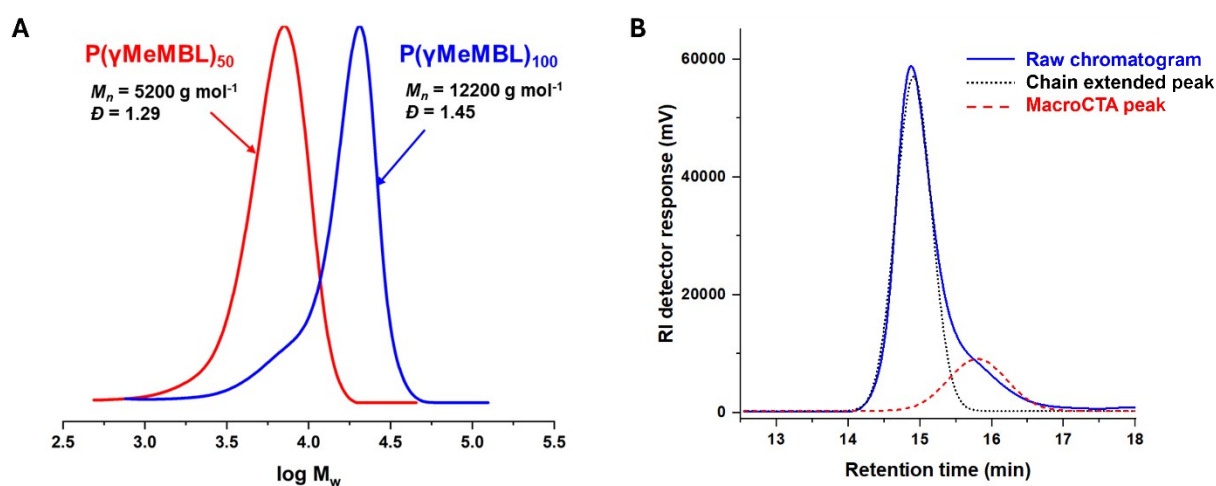

**Figure S5.** A) Normalised molecular weight distributions, obtained via GPC, for P( $\gamma$ MeMBL)<sub>50</sub> synthesised in DMSO (red) and the subsequent P( $\gamma$ MeMBL)<sub>100</sub> (blue) synthesised using the previous polymer as a macro-CTA and growing a target of 50 additional monomer units. B) Deconvolution of the P( $\gamma$ MeMBL)<sub>100</sub> GPC chromatogram, showing the raw RI detector response (blue solid line), deconvoluted peaks for the chain extended P( $\gamma$ MeMBL)<sub>100</sub> (dotted black line) and deconvoluted P( $\gamma$ MeMBL)<sub>50</sub> macroCTA peak (red dashed line). The ratio of the chain extended P( $\gamma$ MeMBL)<sub>100</sub>:P( $\gamma$ MeMBL)<sub>50</sub> macroCTA was 0.8:0.2 determined by the area of peak.

**Table S3.** Thermal characterisation data,  $T_g$  and onset of thermal degradation, for  $P(\gamma\text{MeMBL})_x$  synthesised in Cyrene at 70 °C for 24 h.

| Target Composition            | $T_g^a$<br>(°C) | Onset of thermal degradation <sup>b</sup><br>(°C) |
|-------------------------------|-----------------|---------------------------------------------------|
| $P(\gamma\text{MeMBL})_{50}$  | 206             | 345                                               |
| $P(\gamma\text{MeMBL})_{100}$ | 210             | 354                                               |
| $P(\gamma\text{MeMBL})_{200}$ | 218             | 362                                               |
| $P(\gamma\text{MeMBL})_{400}$ | 221             | 366                                               |

<sup>a</sup> Determined by DSC analyses. <sup>b</sup> Determined by TGA.

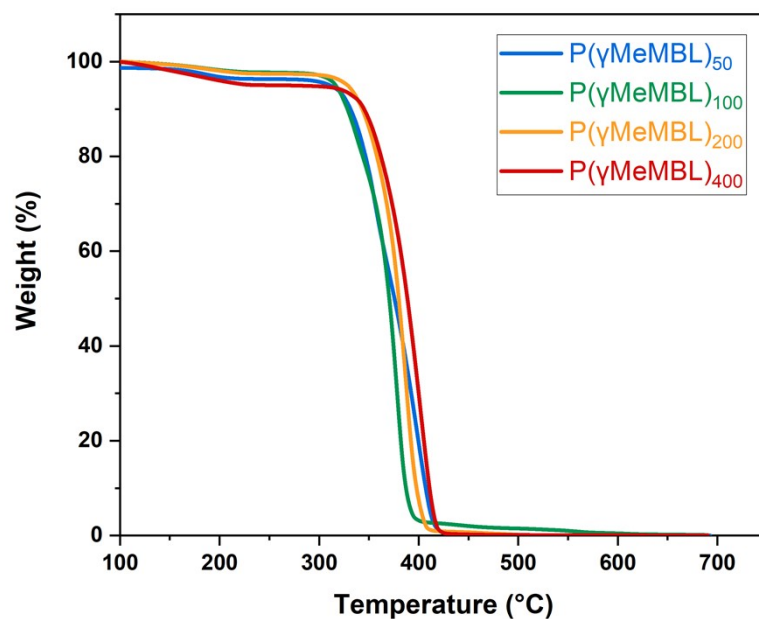

**Figure S6.** TGA profiles for  $P(\gamma\text{MeMBL})$  of various molecular weights synthesised by RAFT solution polymerisation in Cyrene.
